# Extreme climatic events but not environmental heterogeneity shape within-population genetic variation in maritime pine

Juliette Archambeau<sup>1</sup>, Marta Benito Garzón<sup>1</sup>, Marina de Miguel Vega<sup>1,2</sup>, Benjamin Brachi<sup>1</sup>, Frédéric Barraquand<sup>3</sup> and Santiago C. González-Martínez<sup>1</sup>

<sup>1</sup>INRAE, Univ. Bordeaux, BIOGECO, F-33610 Cestas, France

<sup>2</sup>EGFV, Univ. Bordeaux, Bordeaux Sciences Agro, INRAE, ISVV, F-33882, Villenave d'Ornon, France

<sup>3</sup>CNRS, Institute of Mathematics of Bordeaux, F-33400 Talence, France

**Keywords:** quantitative genetic variation, adaptive potential, forest tree, natural selection, environmental heterogeneity, severe cold events.

## 1 Abstract

2 How evolutionary forces interact to maintain quantitative genetic variation within populations has  
3 been a matter of extensive theoretical debates. While mutation and migration increase genetic  
4 variation, natural selection and genetic drift are expected to deplete it. To date, levels of ge-  
5 netic variation observed in natural populations are hard to predict without accounting for other  
6 processes, such as balancing selection in heterogeneous environments. We aimed to empirically  
7 test three hypotheses: (i) admixed populations have higher quantitative genetic variation due to  
8 introgression from other gene pools, (ii) quantitative genetic variation is lower in populations from  
9 harsher environments (i.e. experiencing stronger selection), and (iii) quantitative genetic variation  
10 is higher in populations from spatially heterogeneous environments. We used phenotypic mea-  
11 surements of five growth, phenological and functional traits from three clonal common gardens,  
12 consisting of 523 clones from 33 populations of maritime pine (*Pinus pinaster* Aiton). Populations  
13 from harsher climates (mainly colder areas) showed lower genetic variation for height in the three  
14 common gardens. Surprisingly, we did not find any association between within-population genetic  
15 variation and environmental heterogeneity or population admixture for any trait. Our results sug-  
16 gest a predominant role of natural selection in driving within-population genetic variation, and  
17 therefore indirectly their adaptive potential.

# 18 1 Introduction

19 Most complex traits show substantial heritable variation in natural populations. How evolution-  
20 ary forces interact to maintain such variation remains a long-standing dilemma in evolutionary  
21 biology and quantitative genetics (Johnson and Barton 2005). While mutation and genetic drift  
22 have straightforward roles, generating and eliminating variation respectively, the effect of natural  
23 selection is more complicated (Walsh and Lynch 2018). Stabilizing selection, i.e. the selection of  
24 intermediate phenotypes, is often strong in natural populations (Hereford et al. 2004). This type  
25 of selection is expected to deplete genetic variation (Fisher 1930), either directly on the focal trait  
26 or indirectly via pleiotropic effects (Johnson and Barton 2005). Theoretical models based on the  
27 balance between mutation, drift and stabilizing selection support this idea, but they suggest lower  
28 fitness heritability values than those generally observed in empirical studies (Johnson and Barton  
29 2005). Balancing selection encompasses various evolutionary processes that can maintain greater  
30 than neutral genetic variation within populations (Mitchell-Olds et al. 2007). The most widely  
31 studied of these processes are heterozygote advantage, frequency-dependent selection, e.g. in dis-  
32 ease resistance or self-incompatibility systems (Bergelson et al. 2001, Charlesworth et al. 2005),  
33 and temporally or spatially fluctuating selection pressures (Felsenstein 1976). The maintenance  
34 of stable polymorphism in spatially heterogeneous environments was first theorized by Levene’s  
35 archetypal model (1953), under the assumptions of random mating within generations and soft  
36 selection. Since then, a large corpus of single-locus and polygenic models, most often determinis-  
37 tic, have generally concluded that genetic polymorphisms can only be maintained under restrictive  
38 conditions (Spichtig and Kawecki 2004, Byers 2005). In this line, McDonald and Yeaman (2018)  
39 showed with stochastic individual-based simulations that substantial within-population genetic  
40 variation can be maintained in spatially heterogeneous environments at intermediate migration  
41 rates, regardless of population size. However, the relative importance of the different evolutionary  
42 forces driving within-population genetic variation remains largely unknown.

43 Long-dating empirical work has addressed the evolutionary processes underlying the maintenance  
44 of genetic and discrete-trait polymorphisms (reviewed in Hedrick 1986, 2006), e.g. plant-pathogen  
45 interactions (Karasov et al. 2014), antagonistic pleiotropy (Carter and Nguyen 2011), environmen-  
46 tal heterogeneity (Chakraborty and Fry 2016), and temporal fluctuations (Bergland et al. 2014).  
47 Genomics have allowed the broad application of genome-wide scans for signatures of selection.  
48 Overall these scans suggest that many loci are under adaptive directional selection (Barreiro et  
49 al. 2008, Fu and Akey 2013) and that the proportion of genetic polymorphisms maintained by  
50 environmental heterogeneity tends to be low (Hedrick 2006). However those scans typically have  
51 low power to detect signatures of balancing selection or local adaptation (Fijarczyk and Babik  
52 2015). Far fewer empirical studies have focused on assessing the distribution and extent of the  
53 quantitative genetic variation within populations, and its underlying causes (Lynch and Walsh  
54 1998). Traits more closely related to fitness, such as life-history traits, have generally higher  
55 additive genetic variance, but lower heritabilities, than morphometric traits (Price and Schluter  
56 1991, Houle 1992, Kruuk et al. 2000). The hypothesis that populations evolving under strong  
57 selection pressures display lower levels of genetic variation has been supported in experimentally

58 evolving quail populations under unfavorable vs favorable treatments (Marks 1978), in controlled  
59 experiments (Colautti et al. 2010; but see Merilä et al. 2004, Stock et al. 2014), in natural popu-  
60 lations of *Drosophila birchii* subject to climatic selection (but see *D. bennata* and *D. serrata*; van  
61 Heerwaarden et al. 2009) and in some natural populations of great tits subject to varying levels  
62 of food availability (Charmantier et al. 2004). Higher genetic variation in populations evolving  
63 under spatially varying selection pressures is supported by experimental evolution of *Drosophila*  
64 populations (Mackay 1981, Huang et al. 2015; but not Yeaman et al. 2010) and in forest trees  
65 evaluated in common gardens (Yeaman and Jarvis 2006). The lack of general trends from these  
66 empirical studies can be explained by method-specific pitfalls to accurately estimate quantitative  
67 genetic variation, e.g. the genetic and environmental variances are hard to disentangle in the wild,  
68 and when estimated in common gardens, their environment-dependent nature does not allow for  
69 wide generalization of estimates (Hoffmann and Parsons 1991, Merilä et al. 2001, Charmantier  
70 et al. 2004). In addition, gene flow has been hypothesized to have either a positive effect on the  
71 adaptive potential, by increasing standing genetic variation, or a negative effect via gene swamping  
72 (Kremer et al. 2012, Tigano and Friesen 2016), which may depend on the spatial scale considered  
73 (Bridle et al. 2009).

74 Forest trees have specific life-history traits and genomic features making them interesting model  
75 species in population and quantitative genetic studies (Petit and Hampe 2006, Savolainen et al.  
76 2007). Compared to crop species, they remain largely undomesticated (Neale and Savolainen 2004).  
77 Most forest trees are outcrossing, have high lifetime reproductive output and long generation times.  
78 They often display important gene flow among populations through long-distance pollen dispersal  
79 (Kremer et al. 2012). They show slow rates of macroevolution (i.e. low nucleotide substitution  
80 rates and low speciation rates; Petit and Hampe 2006), generally have large effective population  
81 sizes, with distributions often covering a wide range of environmental conditions (Alberto et al.  
82 2013). Extensive work has revealed strong clines at large geographical scales in the population-  
83 specific mean values of phenotypic traits (reviewed in Savolainen et al. 2007, Benito Garzón et al.  
84 2019), e.g. phenological traits with latitude or altitude (Alberto et al. 2011, Thibault et al. 2020) or  
85 height growth with cold hardiness (Rehfeldt et al. 1999, Leites et al. 2012). Genetic differentiation  
86 at microgeographic spatial scales has also been repeatedly observed (reviewed in Linhart and  
87 Grant 1996, Jump and Peñuelas 2005, Scotti et al. 2016), suggesting rapid rates of microevolution  
88 (Petit et al. 2004, Petit and Hampe 2006). Possible explanations include the fact that forest  
89 trees have high levels of genetic diversity and that most of their quantitative and neutral genetic  
90 variation is within populations (Hamrick 2004). To our knowledge, only two empirical studies  
91 investigated the potential causes underlying the maintenance of quantitative trait variation within  
92 forest tree populations. Yeaman and Jarvis (2006) showed that 20% of growth genetic variation in  
93 lodgepole pine populations was attributable to regional heterogeneity, suggesting an important role  
94 of gene flow and varying selection pressures. In the neotropical oak *Q. oleoides*, Ramírez-Valiente  
95 et al. (2019) found lower quantitative genetic variation in harsher environments, but not higher  
96 quantitative genetic variation in temporally fluctuating environments. They also suggested only a  
97 marginal effect of genetic structure and diversity on the maintenance of within-population genetic  
98 variation.

99 In this study, we aimed to test competing hypotheses regarding the relationship between quan-  
100 titative genetic variation within maritime pine populations and the potential underlying drivers  
101 that maintain this variation. We used phenotypic measurements of growth (height), phenological  
102 (bud burst and duration of bud burst) and functional ( $\delta^{13}\text{C}$  and specific leaf area, SLA) traits  
103 from three clonal common gardens, consisting of 522 clones (i.e. genotypes) from 33 populations,  
104 spanning all known gene pools in the species (Jaramillo-Correa et al. 2015) and genotyped for  
105 5,165 SNPs. For each trait, we compared Bayesian hierarchical models that estimate the relation-  
106 ship between the total genetic variances within populations and some potential drivers, namely  
107 climate's harshness at the locations of origin of the populations (i.e. drought intensity and se-  
108 vere cold events), environmental heterogeneity in the forested areas surrounding the populations,  
109 and the level and origin of admixture in the populations, as estimated with SNP markers. The  
110 competing, but not mutually exclusive, hypotheses tested are: i) the most admixed populations  
111 have higher quantitative genetic variation due to introgression from other gene pools, and this  
112 relationship is proportional to the divergence between sink and source gene pools; ii) quantitative  
113 genetic variation is lower in populations that have evolved in harsher environments, as a result  
114 of higher selection pressures in these regions; and iii) quantitative genetic variation is higher in  
115 populations that have evolved in spatially heterogeneous environments. Importantly, the last two  
116 hypotheses require the action of natural selection, while the first does not. Therefore, we expect  
117 the last two hypotheses to be mostly supported for fitness-related traits, while the first hypothesis  
118 may apply uniformly to all traits. Determining the patterns of within-population quantitative ge-  
119 netic variation across species' ranges and the relative importance of the evolutionary forces driving  
120 the maintenance of such variation is necessary to assess the evolutionary potential of forest tree  
121 populations. Empirical studies tackling these questions remain extremely rare in forest trees (but  
122 see Yeaman and Jarvis 2006, Ramírez-Valiente et al. 2019), yet they are much needed to anticipate  
123 forest tree responses to ongoing global change and therefore develop adaptive management and  
124 conservation strategies.

## 125 **2 Materials & Methods**

### 126 **2.1 Maritime pine, a forest tree growing in heterogeneous environ-** 127 **ments**

128 Maritime pine (*Pinus pinaster* Ait., Pinaceae) is a wind-pollinated, outcrossing and long-lived  
129 tree species with large ecological and economical importance in western Europe and North Africa.  
130 Maritime pine is largely appreciated for its wood, for stabilizing coastal and fossil dunes and, as  
131 a keystone species, for supporting biodiversity (Viñas et al. 2016). The distribution of maritime  
132 pine natural populations is scattered and covers a wide range of environmental conditions. Several  
133 studies have provided evidence of genetic differentiation for adaptive traits in this species, suggest-  
134 ing local adaptation (e.g. González-Martínez et al. 2002, de Miguel et al. 2020). Maritime pine can  
135 grow in widely different climates: the dry climate along the northern coasts of the Mediterranean

136 Basin (from Portugal to western Italy), the mountainous climates of south-eastern Spain and Mo-  
137 rocco, the wetter climate of the Atlantic region (from the Spanish Iberian region to the western  
138 part of France) and the continental climate of central Spain. Maritime pine can also grow on a wide  
139 range of substrates, from sandy and acidic soils to more calcareous ones. Maritime pine presents a  
140 strong population genetic structure with occasional admixture, suggesting gene flow among gene  
141 pools. Six gene pools have been described by previous literature, located in the French Atlantic  
142 region, Iberian Atlantic region, central Spain, south-eastern Spain, Corsica and Northern Africa  
143 (Fig. 1; Alberto et al. 2013, Jaramillo-Correa et al. 2015). These gene pools probably result from  
144 the expansion of different glacial refugia (Bucci et al. 2007, Santos-del-Blanco et al. 2012).

## 145 2.2 Phenotypic data

146 Phenotypic data was obtained from three clonal common gardens (Table S1 and Fig. 1), planted  
147 in 2011 and located in environments considered favorable to maritime pine, as evidenced by the  
148 high survival rate at these sites (Table S1). The common gardens of Asturias (Spain, Iberian  
149 Atlantic region) and Bordeaux (France, French Atlantic region) have very similar climates, with  
150 mild winters, no severe cold events, high annual rainfall and relatively wet summers (Tables S3-S5  
151 and Fig. 1). The common garden of Portugal (planted in Fundão) shows slightly colder winters  
152 and lower summer precipitation than in Asturias (Table S4 and Fig. 1). In each of these common  
153 gardens, trees belonging to 522 clones (i.e. genotypes) from 33 populations, including the six  
154 known gene pools in the species, were planted following a randomized complete block design with  
155 8 blocks, 8 trees per clone and from 2 to 28 clones per population (with an average of 15). To  
156 obtain the clones, trees at least 50 m apart were sampled in natural stands, and one seed per tree  
157 was planted in a nursery and vegetatively propagated by cuttings (see Rodríguez-Quilón et al.  
158 2016 for details). Clones were therefore considered unrelated.

159 One growth trait, height, was measured in all common gardens and at different tree ages (Table  
160 S1). Two phenology-related traits, the mean bud burst date over four years and the mean duration  
161 of bud burst over three years, were measured in Bordeaux and were averaged over several years  
162 to suppress differences across years and approximate a normal distribution of their trait values  
163 (Table S1). Bud burst corresponds to the date of brachyblast emergence in accumulated degree-  
164 days (with base temperature 0°C) from the first day of the year to account for between-year  
165 variability in temperature. The duration of bud burst corresponds to the number of degree-days  
166 between the beginning of bud elongation and the total elongation of the needles (see Hurel et al.  
167 2019). Last, two functional traits,  $\delta^{13}\text{C}$  and the specific leaf area (SLA) were measured in Portugal  
168 (Table S1). These traits were selected because they showed broad-sense heritabilities that were  
169 mostly low but with credibility intervals not crossing zero ( $> 0.08$  in de Miguel et al. 2020). For  
170 each trait, phenotypic means and variances across populations are shown in section 1.1 of the  
171 Supplementary Information. Prior to analyses, some traits were log-transformed to get closer to  
172 normality or mean-centered to help model convergence (Table S1).

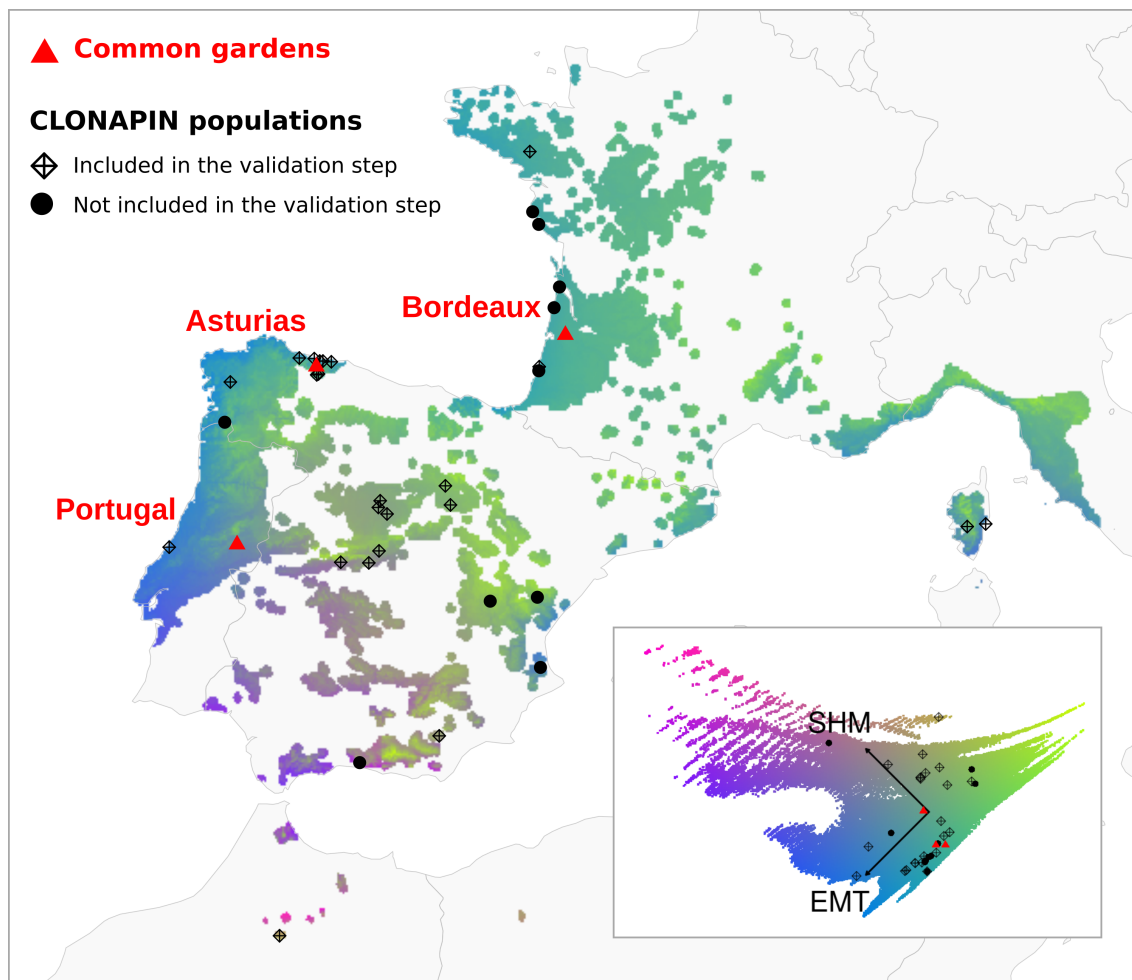

**Figure 1.** Location of the three common gardens and the 33 populations used in the study. The colors represent the gradients of the extreme minimum temperature (EMT) and summer heat moisture index (SHM) over the period 1901-1950 within the maritime pine range. The climatic gradients were obtained by performing a centered and scaled principal component analysis (shown in the inset on the bottom right) based on EMT and SHM values. The maritime pine distribution combines the EUFORGEN distribution (<http://www.euforgen.org/>) and 10-km radius areas around the National Forest Inventory plots with maritime pines. However, this remains a rough approximation of the actual distribution of maritime pine and therefore probably includes areas experiencing more intense cold or drought episodes than the climatic range of maritime pine.

## 173 2.3 SNP genotyping and population admixture

174 The 522 clones planted in the Asturias common garden were genotyped with the Illumina Infinium  
175 assay described in Plomion et al. (2016), resulting in 5,165 high-quality polymorphic SNPs. There  
176 were on average only 3.3 missing values per genotype (ranging between 0 and 142). For each clone,  
177 the proportions of ancestry from each of the six known gene pools were estimated in Jaramillo-  
178 Correa et al. (2015) using the Bayesian approach available in Structure (Pritchard et al. 2000), and  
179 were then averaged by population. Populations were assigned to the gene pool that contributed  
180 more than 50% ancestry and the other gene pools were considered as ‘foreign’ gene pools. First,  
181 we calculated a population admixture score A, as the proportion of ancestry from foreign gene  
182 pools (Table S6). Second, we calculated a population admixture score D that considers both the  
183 proportion of foreign ancestries and the divergence between the main and foreign gene pools (Table  
184 S6). For that, we weighted the proportions of ancestry from foreign gene pools by the sum of the

185 allele frequency divergence of the main and foreign gene pool from the common ancestral one ( $F_k$ ,  
186 which should be numerically similar to  $F_{ST}$ ; Falush et al. 2003). We developed D considering  
187 that some gene pools are more divergent than others and thus may bring higher genetic diversity  
188 to an admixed population at the same level of introgression. A and D were highly correlated  
189 (Pearson correlation coefficient of 0.91; Table S8). We also calculated a score  $D_{fst}$  by weighting the  
190 proportions of ancestry from foreign gene pools by the pairwise  $F_{ST}$  between the main and foreign  
191 gene pools (Table S8).  $D_{fst}$  was highly correlated to A and D (Pearson correlation coefficients of  
192 0.91 and 0.96, respectively) and we therefore did not keep it in the following analyses.

## 193 **2.4 Population-specific environmental heterogeneity and climate** 194 **harshness indexes**

195 To describe the climate under which the populations have evolved, we used the climatic variables  
196 at 1-km resolution and averaged over the period 1901-1950 from the *ClimateEU* database (Marchi  
197 et al. 2020). Topographic data were generated from NASA's Shuttle Radar Topography Mission  
198 (SRTM) at 90-m resolution and then aggregated at 1-km resolution. We used the SAGA v 2.3.1  
199 (Conrad et al. 2015) to calculate the topographic ruggedness index (TRI) which quantifies the  
200 terrain heterogeneity, i.e. differences in elevation between adjacent cells (Riley et al. 1999). Soil  
201 variables were extracted from the European Soil Database at 1-km resolution (Hiederer et al. 2013).  
202 All environmental variables used are listed in Table S7 and were mean-centered and divided by  
203 their standard deviation prior to analyses.

204 To calculate the environmental heterogeneity around each population location, we extracted raster  
205 cell values of the climatic, topographic and soil variables within a 20-km radius around each  
206 population location, and kept only raster cells that fell within forested areas, to avoid including  
207 environmental data from non-suitable areas (e.g. lakes, mountain peaks; section 1.3.2 of the  
208 Supplementary Information). We then performed a principal component analysis (PCA) on the  
209 raster cell values and extracted the PC1 and PC2 scores of each cell, accounting for 45.2% and  
210 34.1% of the variance, respectively (Fig. S10). To obtain the four indexes of environmental  
211 heterogeneity, we calculated the variances of the PC1 and PC2 scores in a 20-km and 1.6-km  
212 radius around each population location. The environmental heterogeneity indexes were only very  
213 weakly correlated (Pearson correlation coefficients lower than 0.36) with the number of forested  
214 cells (i.e. the area considered to calculate the indexes), ensuring that the estimated effects of  
215 environmental heterogeneity in further analyses were not due to the area per se (Triantis et al.  
216 2003, Stein et al. 2014).

217 To describe the climate harshness at each population location, we used a drought index (the  
218 summer heat moisture index averaged over the period 1901-1950, SHM, Table S7) and an index  
219 related to severe cold events (the inverse of the extreme minimum temperature during the period  
220 1901-1950, invEMT, Table S7). These two indexes were selected as maritime pine shows local  
221 adaptation patterns associated with cold tolerance (Grivet et al. 2011) and because detecting  
222 changes in the within-population genetic variation along a drought gradient would be key to

223 anticipate tree population responses to ongoing climate change.

## 224 2.5 Bayesian statistical modeling

225 We modeled the eight phenotypic traits with the same Bayesian statistical model, in which we  
226 estimate the linear relationship between the within-population genetic variance and each of the  
227 potential drivers successively (i.e. one model per driver): the two admixture scores, the four  
228 environmental heterogeneity indexes and the two climate harshness indexes. Each trait  $y$  followed  
229 a normal distribution (Fig. S1), such as:

$$\begin{aligned} y_{bpcr} &= \mathcal{N}(\mu_{bpc}, \sigma_r^2) \\ \mu_{bpc} &= \beta_0 + B_b + P_p + C_{c(p)} \end{aligned} \quad (1)$$

230 where  $\sigma_r^2$  is the residual variance,  $\beta_0$  the global intercept, and  $B_b$ ,  $P_p$  and  $C_{c(p)}$  are the block, pop-  
231 ulation and clone (nested within population) varying intercepts, which are drawn from a common  
232 distribution, such as:

$$\begin{aligned} \begin{bmatrix} B_b \\ P_p \end{bmatrix} &\sim \mathcal{N}\left(0, \begin{bmatrix} \sigma_B^2 \\ \sigma_P^2 \end{bmatrix}\right) \\ C_{c(p)} &\sim \mathcal{N}(0, \sigma_{C_p}^2) \end{aligned} \quad (2)$$

233 where  $\sigma_B^2$  and  $\sigma_P^2$  are the variance among blocks and populations and  $\sigma_{C_p}^2$  are the population-  
234 specific variances among clones (i.e. the within-population genetic variation). To estimate the  
235 association between  $\sigma_{C_p}^2$  and its potential underlying drivers, we expressed  $\sigma_{C_p}$  as follows:

$$\sigma_{C_p} \sim \mathcal{LN}\left(\ln(\overline{\sigma_{C_p}}) - \frac{\sigma_K^2}{2} + \beta_X X_p, \sigma_K^2\right) \quad (3)$$

236 where  $\overline{\sigma_{C_p}}$  is the mean of the population-specific standard deviation among clones  $\sigma_{C_p}$  and  $X_p$  is  
237 the potential driver considered (see section 2 in the Supplementary Information for more details).

238 To test the accuracy of the model estimates for  $\sigma_K^2$  and  $\beta_X$ , we simulated data based on two traits  
239 (height in Portugal and Bordeaux at 20 and 25-month old, respectively). For each trait, we ran  
240 100 simulations and extracted the mean standard error and bias error of the estimates and the  
241 coverage of the 80% and 95% credible intervals.

242 Model specification and fit were performed using the Stan probabilistic programming language  
243 (Carpenter et al. 2017), based on the no-U-turn sampler algorithm. Models were run with four  
244 chains and between 2,500 iterations per chain depending on the models (including 1,250 warm-up



245 samples not used for the inference). All analyses were undertaken in R version 3.6.3 (R Core Team  
246 2020) and scripts are available at <https://github.com/JulietteArchambeau/H2Pinpin>.

## 247 **2.6 Validation step on independent data**

248 To validate our results for height, we used an independent dataset provided by Ricardo Alia in  
249 which 23 populations shared with the CLONAPIN network were planted in a progeny test near  
250 Asturias (thus in a similar environment). As the progeny test is based on families, we were able to  
251 estimate the additive genetic variance within populations. We applied the same model as in our  
252 study (replacing clones by families) to height measurements when the trees were 3 and 6-year old  
253 (see section 7 of the Supplementary Information for more details).

## 254 **3 Results**

255 In the data simulation,  $\sigma_K^2$  (the standard deviation of the logarithm of the within-population  
256 genetic variation) and  $\beta_X$  (the coefficient of the potential drivers of the within-population genetic  
257 variation) were properly estimated by the models (Table S9 and S10). Across 100 simulations, the  
258 mean standard error was around 0.066 for  $\sigma_K^2$  and 0.054 for  $\beta_X$ , the mean bias error was around  
259 0.018 for  $\sigma_K^2$  and -0.004 for  $\beta_X$ , the coverage of the 80% credible interval was around 93% for  $\sigma_K^2$   
260 and 80% for  $\beta_X$ , and the coverage of the 95% credible interval was around 98% for  $\sigma_K^2$  and 96%  
261 for  $\beta_X$  (Table S9 and S10). These simulations therefore showed that, under the assumption that  
262 the statistical model reflects the processes at work, our model displayed a satisfactory accuracy to  
263 be used in the following analyses.

264 The proportion of variance explained by the models (i.e. the sum of the among-population, among-  
265 clone and among-block variances) and the variance partitioning varied broadly across traits (Fig.  
266 S11 and section 5.3 in the Supplementary Information). More specifically, the models explained  
267 between 40% and 50% of the variance for phenology-related traits, between 30% and 40% for  
268 functional traits, and from 20% for height in Portugal to almost 60% for height in Bordeaux at  
269 85-month old (Fig. S11). Residual variance explained most of the variance for all traits, except  
270 for height in Bordeaux at 85-month old, where 40% of the variance came from variation among  
271 populations, 40% from residuals and the remaining 20% from variation among clones (Fig. S18).  
272 Variation among populations was higher than variation among clones for height and  $\delta_{13}\text{C}$  (Figs.  
273 S14, S16, S18, S20 and S28), but not for SLA and phenology-related traits (Figs. S26, S22 and  
274 S24).

275 Environmental heterogeneity indexes and population admixture scores were not associated with  
276 within-population genetic variation for any trait (Figs. 2 and S12). In contrast, we found a  
277 consistent negative association with the inverse of the extreme minimum temperature across the  
278 three common gardens for height, indicating that populations undergoing severe cold events display

279 less genetic variation (Fig. 2). Interestingly, in the Bordeaux common garden, this negative  
 280 relationship was found at 25-month old, but not at 85-month old (Fig. 2). A negative association  
 281 with the summer heat moisture index was also detected for height in Asturias, and less markedly  
 282 but still with a high probability in Bordeaux at 25-month old (Fig. 2). Holding all other parameters  
 283 constant, a one-standard deviation increase in the inverse of the extreme minimum temperature  
 284 was associated, on average, with a 32.6%, 21.6% and 17.9% decrease of  $\sigma_{C_p}$  for height in Portugal,  
 285 Bordeaux at 25-month old and Asturias, respectively. Similarly, a one-standard deviation increase  
 286 in the summer heat moisture index was associated, on average, with 15.6% and 23.8% decrease of  
 287  $\sigma_{C_p}$  for height in Bordeaux at 25-month old and Asturias, respectively (see details of the calculation  
 288 in the section 4 of the Supplementary Information). Unexpectedly, populations experiencing severe  
 289 cold events showed higher genetic variation for SLA (Fig. 2). Within-population genetic variation  
 290 was not correlated with the number of clones per population for any trait (maximum Pearson  
 291 correlation coefficient = 0.57; Table S11).

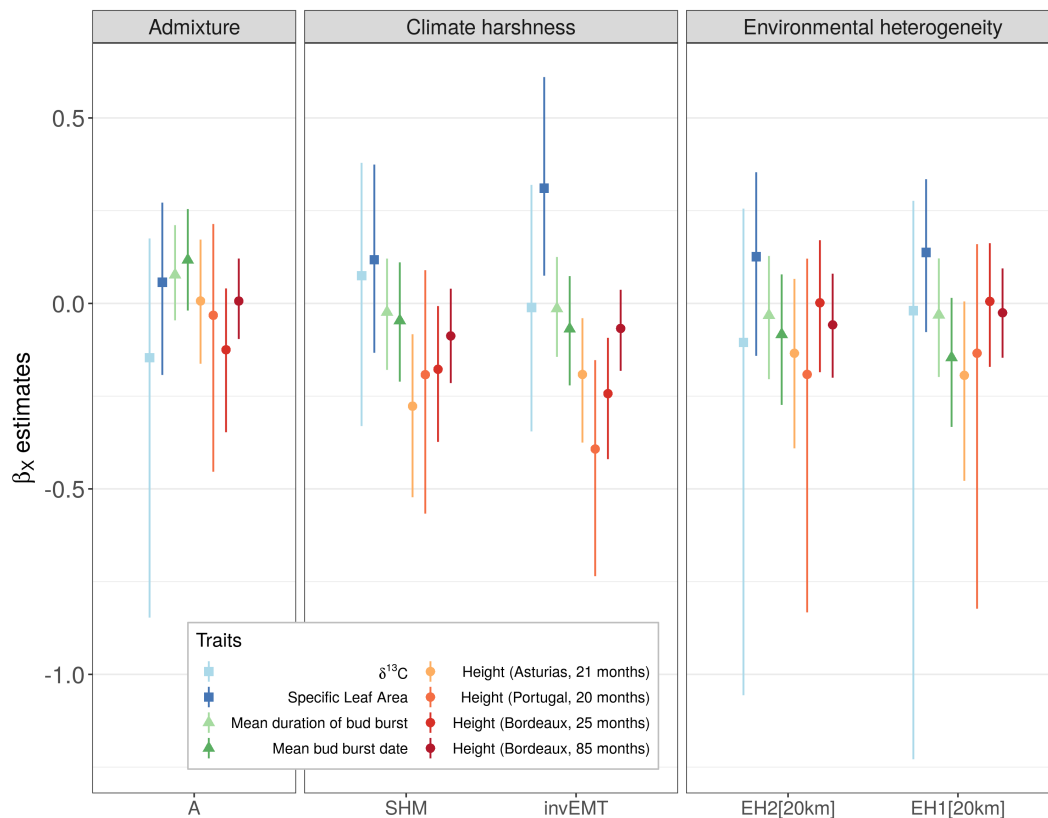

**Figure 2.** Median and 95% credible intervals of the  $\beta_X$  posterior distributions.  $\beta_X$  coefficients stand for the association between the within-population genetic variation and its potential underlying drivers on the x-axis: the inverse of the extreme minimum temperature during the studied period (invEMT), the summer heat moisture index (SHM), an admixture score (A), the environmental heterogeneity in a 20-km radius around the population location (EH1[20km] and EH2[20km]) calculated based on the projection of the PC1 and PC2 scores. Colors stand for the different traits under study and the shapes for the different types of traits, i.e. functional traits (squares), phenology-related traits (triangles) and height (circles).

292 Importantly, in the validation analysis, we also found a negative association between the inverse of  
 293 the extreme minimum temperature and the within-population additive genetic variation for height  
 294 at 3-year old, but not at 6-year old, and we did not find any association with the other potential  
 295 drivers (Fig. 3).

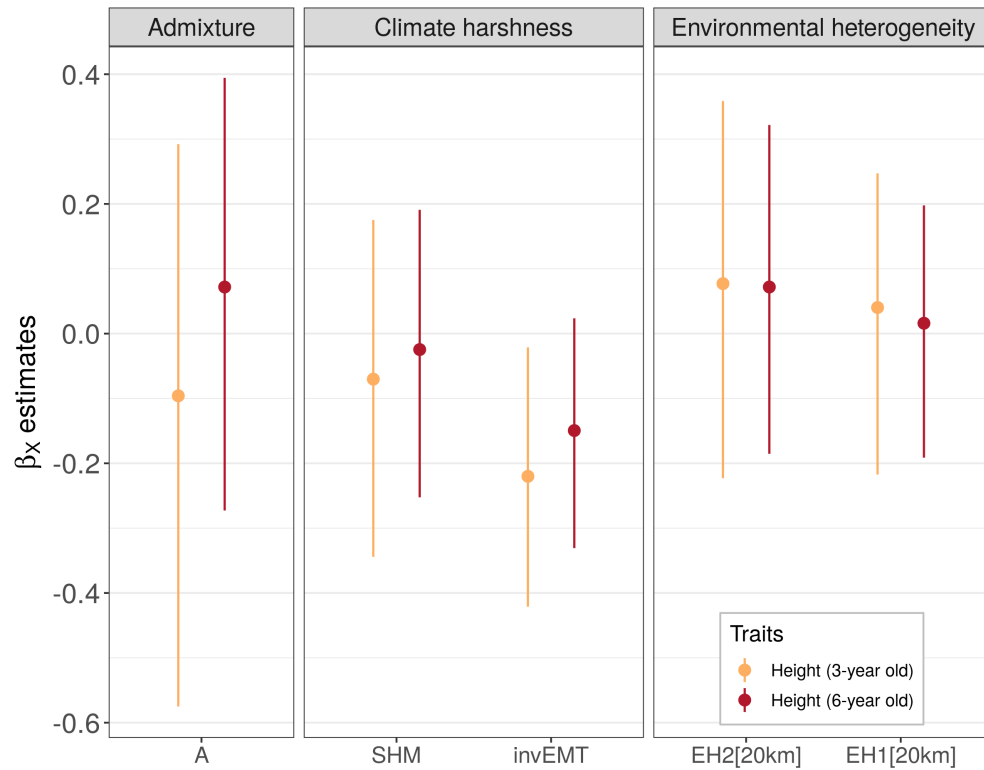

**Figure 3.** Validation step using independent height measurements from a common garden near Asturias. Median and 95% credible intervals of the  $\beta_X$  posterior distributions are shown. In the validation analysis,  $\beta_X$  coefficients stand for the association between the within-population additive genetic variation and its potential underlying drivers on the x-axis. A description of the drivers can be found in the legend of Fig. 2.

## 296 4 Discussion

297 How quantitative genetic variation is maintained within populations remains a long-standing open  
298 question that has been extensively explored in theoretical work but lacks empirical evidence to  
299 date (Johnson and Barton 2005). Our study suggests that genetic variation for height in maritime  
300 pine is lower in populations exposed to severe cold events, thus supporting the hypothesis that  
301 quantitative genetic variation in fitness-related traits is lower in populations under strong selection  
302 (Fisher 1930). Across all traits studied, we did not find higher genetic variation in populations  
303 located in heterogeneous landscapes, which goes against the predictions of some theoretical models  
304 (McDonald and Yeaman 2018, Walsh and Lynch 2018) and an empirical study in lodgepole pine  
305 (Yeaman and Jarvis 2006). Admixed populations did not show higher genetic variation, suggesting  
306 that the observed patterns are not confounded by gene flow between distinct gene pools increasing  
307 genetic variation. Empirically-based detection of the footprints of natural selection on within-  
308 population genetic variation is much needed to understand how populations are adapted to their  
309 current environments and will evolve under changing conditions.

## 310 4.1 Severe cold events may decrease within-population genetic varia- 311 tion

312 Height genetic variation was lower in populations experiencing harsher climates, especially severe  
313 cold events (invEMT; Fig. 2). This result supports the hypothesis that strong stabilizing selection  
314 in harsh environments depletes quantitative genetic variation within populations (Fisher 1930) and  
315 echoes similar results in another forest tree, *Quercus oleoides*. For this Mesoamerican white oak  
316 species, Ramírez-Valiente et al. (2019) found lower genetic variation averaged over functional and  
317 growth traits in populations experiencing low precipitation and high temperatures during the dry  
318 season. The importance of severe cold events as a driver of height genetic variation in maritime  
319 pine is supported by the association between candidate-gene allele frequency and temperature  
320 gradients (Grivet et al. 2011, Jaramillo-Correa et al. 2015), suggesting a major role of minimum  
321 temperatures in the species adaptive evolution. Indeed, lower genetic variation in areas subject  
322 to cold events may enhance adaptation to local conditions, but it may also hamper the adaptive  
323 potential of populations under new climates. Noticeably, severe cold events were highly correlated  
324 with altitude in our study (Pearson’s correlation of 0.9), and adaptation patterns along altitudinal  
325 gradients are common in forest trees (e.g. Kurt et al. 2012). Therefore, we cannot exclude that the  
326 association between height genetic variation and severe cold events is triggered by more complex  
327 environmental factors typical of high altitude conditions (e.g. reduced vapor pressure deficit,  
328 higher maximum solar radiation; Körner 1995). Estimating selection strength directly in natural  
329 populations, as in Bontemps et al. (2016), would be highly valuable, albeit challenging in forest  
330 trees.

331 Within-population genetic variation was unlikely to be influenced by demographic history and  
332 gene flow across gene pools, as we did not find any association between within-population genetic  
333 variation for height (and other traits) and population admixture indexes (Fig. 2). Another po-  
334 tential scenario that may explain our results is related to the joint effect of environment on the  
335 short-term expression of quantitative genetic variation and the strength of natural selection in the  
336 novel environments of the common gardens (Hoffmann and Merilä 1999, Wood and Brodie 2016;  
337 see examples for natural populations in Wilson et al. 2006 for wild sheep and Husby et al. 2011  
338 for great tits). Noticeably, the expression of hidden genetic variation in novel environments (i.e.  
339 ‘cryptic genetic variation’; Schlichting 2008) may be as large as the genetic variation resulting from  
340 the long-term divergent evolution of populations (Wood and Brodie 2015). However, in our study,  
341 this scenario is unlikely as the negative associations between height genetic variation and climate  
342 harshness were consistent across the three common gardens (i.e. across distinct environmental  
343 conditions; partially reflected in Fig. 1; see also Tables S3-S5), which suggests that the lower  
344 height genetic variation in populations from harsher climates is independent from the environmen-  
345 tal conditions in the common gardens and thus likely to be intrinsic to the populations. Last,  
346 the sampled populations may not fully cover the climatic range of maritime pine (Fig. 1), which  
347 reduces our ability to detect an association between some climatic drivers and within-population  
348 genetic variation, and therefore may explain why no association was detected for the summer heat  
349 moisture index (SHM).

350 Most importantly, the validation analysis provided independent evidence that additive within-  
351 population genetic variation for height was lower in populations experiencing extreme cold events  
352 for young trees but not for older trees (Fig. 3). This supports the robustness of our study and  
353 suggests that our results were unlikely to be biased by considering the total variance instead of  
354 the additive one, which was somehow expected as two previous studies in maritime pine found low  
355 non-additive effects for growth (Gaspar et al. 2013), and height and diameter (Lepoittevin et al.  
356 2011).

357 With respect to specific leaf area (SLA), where only a single common garden (i.e. a single environ-  
358 ment) was assessed, cryptic genetic variation (as defined above) may indeed underlie the higher  
359 genetic variation found in populations experiencing severe cold events. A study in maritime pine  
360 suggests that SLA depends strongly on environmental conditions (Alía et al. 2014), which is sup-  
361 ported in our study by its weak genetic variation in the Portugal common garden (less than 10%  
362 of the phenotypic variance is explained by the population or clone effects), with a large part of the  
363 variance associated with the block effect (Fig. S26). Cryptic genetic variation is more likely to be  
364 expressed when the differences between original and current environments are large (Paaby and  
365 Rockman 2014). Some populations experiencing severe cold events (and high altitude conditions)  
366 may therefore have reached the threshold inducing a release of cryptic variation in the Portugal  
367 common garden. However, this is not a general pattern as we did not find any association between  
368 the climatic transfer distances (i.e. the absolute difference between the climate in the population  
369 and the climate in the test site) and the within-population genetic variation for SLA (see section  
370 6 of the Supplementary Information). Replicating SLA measurements in common gardens at high  
371 altitude or experiencing extreme cold episodes would be highly valuable to test this hypothesis.

## 372 **4.2 Environmental heterogeneity is not associated with higher genetic** 373 **variation**

374 Populations from heterogeneous environments did not show higher genetic variation for any trait  
375 (Fig. 2), which was also the case for the independent height data from the validation analysis  
376 (Fig. 3). This goes against a previous estimate in lodgepole pine suggesting that up to 20% of  
377 the genetic variation in growth within populations is explained by environmental heterogeneity  
378 (Yeaman and Jarvis 2006). A potential explanation of this discrepancy is the smaller experiment  
379 size in our study compared to that of Yeaman and Jarvis (103 populations with an average of 28  
380 planting sites per population). However, in our study, we obtained reasonable credible intervals  
381 for most traits (allowing the detection of associations with other drivers) and data simulations  
382 suggested that our models have adequate power, rendering this explanation unlikely.

383 Another explanation is that genetic variation within populations is not affected by the environ-  
384 mental heterogeneity at the regional scale imposed by the  $1 \times 1$  km resolution of our climate  
385 dataset but at finer spatial scales (also discussed in Yeaman and Jarvis 2006). Indeed, popula-  
386 tions can adapt along microgeographic environmental gradients despite the homogenizing effect  
387 of gene flow (Richardson et al. 2014), even for forest tree populations with their long-generation

388 times and large effective population sizes (Scotti et al. 2016). However, a correlation between  
389 regional and microgeographic environmental heterogeneity across the maritime pine range is very  
390 likely: populations showing the highest environmental heterogeneity in our study were located in  
391 mountainous areas in which we also expect higher microgeographic variation, e.g. the C6mpeta  
392 population (COM) located in the Tejada and Almjara mountains (southern Spain), the Arenas  
393 de San Pedro population (ARN) located in the Sierra de Gredos (central Spain) or the Pineta  
394 population (PIE) located close to the Punta di Forchelli (Corsican mountains), while populations  
395 with the lowest environmental heterogeneity were located on flat plateaus, e.g. populations from  
396 the Landes plateau and the Atlantic coastal regions in France (HOU, MIM, PET, VER, OLO,  
397 STJ, PLE), and populations from the central Spain plateau near to Segovia (CUE, COC, CAR).  
398 Thus, even if genetic variation was maintained by migration-selection balance at microgeographic  
399 scales, we would have been able to detect the effect of environmental heterogeneity at the regional  
400 scale. Nevertheless, more studies characterizing adaptation at microgeographic scales are needed  
401 to assess the spatial scale of genetic adaptation in maritime pine.

402 Another explanation of the discrepancy with Yeaman and Jarvis (2006) could be that we used  
403 young trees (between 20 and 85-month old) while they used 20-year old trees. Indeed, the pro-  
404 cesses generating within-population genetic variation might be age-dependent, as shown for climate  
405 harshness in Bordeaux, where the association was present when the trees were 25-month old but  
406 not in older trees. In forest trees, genetic parameters often vary with age; e.g. heritability generally  
407 increases with age until reaching a plateau, especially for height-related traits (Balocchi et al. 1993,  
408 Johnson et al. 1997, Sierra-Lucero et al. 2002, Jansson et al. 2003, Kroon et al. 2011), but may also  
409 decrease in some cases (Lu and Charrette 2008, Kroon et al. 2011). In maritime pine, an increase  
410 in heritability with age was found in Costa and Durel (2011) but not in Kusnandar et al. (1998).  
411 To our knowledge, the drivers of heritability changes with age remain unclear. Competition among  
412 trees in common gardens might play a role in the expression of age-dependent heritabilities for  
413 diameter growth, but not for height in *Pinus radiata* (Lin et al. 2013). Replicating our analysis in  
414 older trees would be interesting to further assess patterns of association between within-population  
415 genetic variation and environmental heterogeneity, and their underlying causes.

416 Finally, a last explanation is related to the different biological features between lodgepole pine and  
417 maritime pine. Lodgepole pine has extensive gene flow and low population structure ( $F_{ST} = 0.016$   
418 in Yeaman et al. 2016) while maritime pine shows restricted gene flow with strong population struc-  
419 ture (at least six distinct gene pools and  $F_{ST} = 0.112$ ; Jaramillo-Correa et al. 2015; our study) and  
420 fragmented distribution (Alberto et al. 2013). Pollen dispersal kernels in maritime pine are highly  
421 leptokurtic, as for other wind-pollinated pines (Schuster and Mitton 2000, Robledo-Arnuncio and  
422 Gil 2005), with estimated mean dispersal distances from 78.4 to 174.4m (de-Lucas et al. 2008).  
423 Interestingly, McDonald and Yeaman (2018) showed that high levels of quantitative genetic vari-  
424 ance can be maintained when a trait is under stabilizing selection only at intermediate levels of  
425 migration. Migration rates in maritime pine may therefore not be strong enough to compensate  
426 for the purifying effect of natural selection in heterogeneous environments, especially in moun-  
427 tainous areas which may represent barriers to gene flow and where populations are more isolated  
428 (see Gonz6lez-Mart6nez et al. 2007 for maritime pine). Meanwhile, in the homogeneous plateaus

429 of the Landes forest and central Spain, natural selection may be low because conditions are more  
430 favorable, and these populations are less isolated, which may maintain genetic variation at lev-  
431 els similar to those of populations in heterogeneous landscapes. Investigating local adaptation  
432 and gene flow at microgeographic scales in natural populations of maritime pine located in both  
433 homogeneous and heterogeneous environments would be highly valuable to understand why en-  
434 vironmental heterogeneity does not seem to play a major role in maintaining genetic variation  
435 in this species. Moreover, conducting similar analyses in sister species such as Scots pine, with  
436 low population genetic structure and continuous populations (Alberto et al. 2013), could help to  
437 determine whether genetic variation in forest tree populations experiencing higher migration rates  
438 are more prone to be impacted by environmental heterogeneity.

### 439 **4.3 Link to fitness and genetic constraints may explain the different** 440 **patterns across traits**

441 Height was the only trait that showed a consistent association between within-population genetic  
442 variation and climate harshness. This pattern supports the hypothesis that natural selection  
443 mainly depletes genetic variation of traits most directly related to fitness. Indeed, height can be  
444 seen as the end-product of multiple ecophysiological processes (Grattapaglia et al. 2009). Taller  
445 trees perform better in the competition for light, water and nutrients, and are therefore more likely  
446 to have higher fecundity (Rehfeldt et al. 1999, Wu and Ying 2004, Aitken and Bemmels 2015) and  
447 lower mortality (Wyckoff and Clark 2002, Zhu et al. 2017). However, taller trees are also more  
448 susceptible to spring and fall cold injury (Howe et al. 2003) and to drought (Bennett et al. 2015,  
449 McDowell and Allen 2015, Stovall et al. 2019). In maritime pine, effective reproductive success (i.e.  
450 the number of successfully established offspring) is related to tree size. Indeed, González-Martínez  
451 et al. (2006) found a significant positive female selection gradient for diameter (height was not  
452 tested, but diameter and height are strongly correlated in conifers; see, for example, Fig. 1 in  
453 Castedo-Dorado et al. 2005 for maritime pine) and suggested that offspring mothered by bigger  
454 trees could have a selective advantage due to better quality seeds favouring resilience in the face  
455 of severe summer droughts and microsite variation. This evidence also supports the idea of height  
456 as a relevant fitness component in maritime pine.

457 Although less directly related to fitness than height, leaf phenology-related traits exhibit steep  
458 adaptation gradients in forest trees and have a relatively high heritability, e.g. 0.15-0.51 for bud  
459 burst in pedunculate oak (Scotti-Saintagne et al. 2004), 0.45-1 in Sitka spruce (Alfaro et al. 2000)  
460 and 0.54 for bud burst and 0.30 for the duration of bud burst in our study in maritime pine.  
461 Gauzere et al. (2020) showed that both the mean and the variance of leaf phenology-related traits  
462 varied along an altitudinal gradient in natural oak populations, with populations at high altitude  
463 having a narrower fitness peak. We might therefore have expected lower genetic variation for leaf  
464 phenology-related traits in populations experiencing severe cold events (and at higher altitude), as  
465 found along an altitudinal gradient in sessile oak for bud phenology (Alberto et al. 2011). However,  
466 such association may be hidden in common gardens with different climates from those of the

467 populations' location, because of the release of high levels of cryptic genetic variation (Schlichting  
468 2008). Moreover, phenology-related traits can show opposite genetic clines in common gardens and  
469 natural populations (e.g. Vitasse et al. 2009). Estimating genetic parameters of phenology-related  
470 traits directly in the field, which is now technically possible by using large genomic datasets and  
471 advanced statistical methodologies (Gienapp et al. 2017), may therefore be necessary to investigate  
472 potential associations between within-population genetic variation and climate harshness, or other  
473 selective pressures.

474 Importantly, theoretical work suggests that much of the genetic variation associated with a trait  
475 is likely maintained by pleiotropic effects, which are independent of the selection on that trait,  
476 implying that stabilizing selection can only act on a reduced number of independent dimensions in  
477 the trait space (Barton 1990, Walsh and Lynch 2018). As we used univariate models, we cannot  
478 exclude that the likely associations with height genetic variation originate from genetic correlation  
479 with other traits under selection, or that the lack of association with other traits (notably functional  
480 traits such as  $\delta^{13}\text{C}$ ) does not originate from genetic constraints (Walsh and Blows 2009). For  
481 example, in maritime pine, trait canalisation and genetic constraints may explain low quantitative  
482 genetic differentiation for hydraulic traits (e.g. P50, the xylem pressure inducing 50% loss of  
483 hydraulic conductance; Lamy et al. 2014), and sapling height was found to be either positively or  
484 negatively associated with disease susceptibility depending on the pathogen (e.g. necrosis length  
485 caused by *Diplodia sapinea* or *Armillaria ostoyae*, respectively; Hurel et al. 2019). Trade-offs  
486 between traits may also explain the unexpected association between minimum temperatures and  
487 high genetic variation for SLA, as, for instance, SLA is known to be positively correlated with  
488 leaf life span, low assimilation rates and nutrient retention, i.e. traits linked to conservation of  
489 acquired resources (Ackerly et al. 2002).

## 490 5 Conclusion

491 Our manuscript contributes to the current debate on the maintenance of quantitative genetic  
492 variation within populations by providing empirical support for the role of natural selection in  
493 decreasing genetic variation. Indeed, our results consistently showed that genetic variation for  
494 height is lower in maritime pine populations experiencing severe cold events (i.e. experiencing  
495 stronger selection). Surprisingly, we found no association between environmental heterogeneity at  
496 the regional scale and within-population genetic variation for several traits; whether for technical  
497 reasons (e.g. sample size, spatial scale considered) or for genuine biological reasons (e.g. too  
498 low migration), it would be worth further exploration. Indeed, understanding the evolutionary  
499 forces shaping within-population genetic variation could shed light on how populations adapt to  
500 their local environment, thereby providing insight into how they may respond to future changes in  
501 environmental conditions.



## 502 6 Acknowledgments

503 We thank A. Saldaña, F. del Caño, E. Ballesteros and D. Barba (INIA) and the ‘Unité  
504 Expérimentale Forêt Pierroton’ (UEFP, INRAE; doi:10.15454/1.5483264699193726E12) for field  
505 assistance (plantation and measurements). Data used in this research are part of the Spanish  
506 Network of Genetic Trials (GENFORED, <http://www.genfored.es>). We thank all persons and  
507 institutions linked to the establishment and maintenance of field trials used in this study. We are  
508 very grateful to Ricardo Alía and Juan Majada who initiated and supervised the establishment of  
509 the CLONAPIN network and provided the progeny test height data that we used in the validation  
510 analysis. We thank Maurizio Marchi for kindly providing the raster files of the climate variables  
511 corresponding to the desired time period and spatial extent. JA was funded by the University  
512 of Bordeaux (ministerial grant). This study was funded by the ‘Initiative d’Excellence (IdEx) de  
513 l’Université de Bordeaux - Chaires d’installation 2015’ (EcoGenPin) and the European Union’s  
514 Horizon 2020 research and innovation programme under grant agreements No 773383 (B4EST)  
515 and No 862221 (FORGENIUS).

## References

- Ackerly, D., Knight, C., Weiss, S., Barton, K., and Starmer, K. 2002. Leaf size, specific leaf area and microhabitat distribution of chaparral woody plants: contrasting patterns in species level and community level analyses. *Oecologia* **130**: 449– 457.
- Aitken, S. N. and Bemmels, J. B. 2015. Time to get moving: assisted gene flow of forest trees. *Evolutionary Applications* **9**: 271– 290.
- Alberto, F., Aitken, S. N., Alía, R., González-Martínez, S. C., Hänninen, H., Kremer, A., Lefèvre, F., Lenormand, T., Yeaman, S., Whetten, R., and Savolainen, O. 2013. Potential for evolutionary responses to climate change – evidence from tree populations. *Global Change Biology* **19**: 1645– 1661.
- Alberto, F., Bouffier, L., Louvet, J.-M., Lamy, J.-B., Delzon, S., and Kremer, A. 2011. Adaptive responses for seed and leaf phenology in natural populations of sessile oak along an altitudinal gradient. *Journal of Evolutionary Biology* **24**: 1442– 1454.
- Alfaro, R. I., Lewis, K. G., King, J. N., El-Kassaby, Y. A., Brown, G., and Smith, L. D. 2000. Budburst phenology of sitka spruce and its relationship to white pine weevil attack. *Forest Ecology and Management* **127**: 19– 29.
- Alía, R., Chambel, R., Notivol, E., Climent, J., and González-Martínez, S. C. 2014. Environment-dependent microevolution in a Mediterranean pine (*Pinus pinaster*Aiton). *BMC Evolutionary Biology* **14**: 200.
- Balocchi, C. E., Bridgwater, F. E., Zobel, B. J., and Jahromi, S. 1993. Age Trends in Genetic Parameters for Tree Height in a Nonselected Population of Loblolly Pine. *Forest Science* **39**: 231– 251.
- Barreiro, L. B., Laval, G., Quach, H., Patin, E., and Quintana-Murci, L. 2008. Natural selection has driven population differentiation in modern humans. *Nature Genetics* **40**: 340– 345.
- Barton, N. H. 1990. Pleiotropic models of quantitative variation. *Genetics* **124**: 773– 782.

- Benito Garzón, M., Robson, T. M., and Hampe, A. 2019.  $\Delta$ TraitSDMs: species distribution models that account for local adaptation and phenotypic plasticity. *New Phytologist* **222**: 1757– 1765.
- Bennett, A. C., McDowell, N. G., Allen, C. D., and Anderson-Teixeira, K. J. 2015. Larger trees suffer most during drought in forests worldwide. *Nature Plants* **1**: 15139.
- Bergelson, J., Kreitman, M., Stahl, E. A., and Tian, D. 2001. Evolutionary Dynamics of Plant R-Genes. *Science* **292**: 2281– 2285.
- Bergland, A. O., Behrman, E. L., O'Brien, K. R., Schmidt, P. S., and Petrov, D. A. 2014. Genomic Evidence of Rapid and Stable Adaptive Oscillations over Seasonal Time Scales in *Drosophila*. *PLOS Genetics* **10**: e1004775.
- Bontemps, A., Lefèvre, F., Davi, H., and Oddou-Muratorio, S. 2016. In situ marker-based assessment of leaf trait evolutionary potential in a marginal European beech population. *Journal of Evolutionary Biology* **29**: 514– 527.
- Bridle, J. R., Gavaz, S., and Kennington, W. J. 2009. Testing limits to adaptation along altitudinal gradients in rainforest *Drosophila*. *Proceedings of the Royal Society B: Biological Sciences*.
- Bucci, G., González-Martínez, S. C., Provost, G. L., Plomion, C., Ribeiro, M. M., Sebastiani, F., Alía, R., and Vendramin, G. G. 2007. Range-wide phylogeography and gene zones in *Pinus pinaster* Ait. revealed by chloroplast microsatellite markers. *Molecular Ecology* **16**: 2137– 2153.
- Byers, D. L. 2005. Evolution in heterogeneous environments and the potential of maintenance of genetic variation in traits of adaptive significance. *Genetica* **123**: 107.
- Carpenter, B., Gelman, A., Hoffman, M. D., Lee, D., Goodrich, B., Betancourt, M., Brubaker, M., Guo, J., Li, P., and Riddell, A. 2017. Stan : A Probabilistic Programming Language. *Journal of Statistical Software* **76**.
- Carter, A. J. and Nguyen, A. Q. 2011. Antagonistic pleiotropy as a widespread mechanism for the maintenance of polymorphic disease alleles. *BMC Medical Genetics* **12**: 160.
- Castedo-Dorado, F., Anta, M. B., Parresol, B. R., and González, J. G. Á. 2005. A stochastic height-diameter model for maritime pine ecoregions in Galicia (northwestern Spain). *Annals of Forest Science* **62**: 455– 465.
- Chakraborty, M. and Fry, J. D. 2016. Evidence that Environmental Heterogeneity Maintains a Detoxifying Enzyme Polymorphism in *Drosophila melanogaster*. *Current Biology* **26**: 219– 223.
- Charlesworth, D., Vekemans, X., Castric, V., and Glémin, S. 2005. Plant self-incompatibility systems: a molecular evolutionary perspective. *New Phytologist* **168**: 61– 69.
- Charmantier, A., Kruuk, L. E. B., Blondel, J., and Lambrechts, M. M. 2004. Testing for microevolution in body size in three blue tit populations. *Journal of Evolutionary Biology* **17**: 732– 743.
- Colautti, R. I., Eckert, C. G., and Barrett, S. C. H. 2010. Evolutionary constraints on adaptive evolution during range expansion in an invasive plant. *Proceedings of the Royal Society B: Biological Sciences* **277**: 1799– 1806.
- Conrad, O., Bechtel, B., Bock, M., Dietrich, H., Fischer, E., Gerlitz, L., Wehberg, J., Wichmann, V., and Böhner, J. 2015. System for Automated Geoscientific Analyses (SAGA) v. 2.1.4. *Geoscientific Model Development* **8**: 1991– 2007.
- Costa, P. and Durel, C. E. 2011. Time trends in genetic control over height and diameter in maritime pine. *Canadian Journal of Forest Research*.
- de Miguel, M., Rodríguez-Quilón, I., Heuertz, M., Hurel, A., Grivet, D., Jaramillo-Correa, J.-P., Vendramin, G. G., Plomion, C., Majada, J., Alía, R., Eckert, A. J., and González-Martínez, S. C. 2020. Polygenic adaptation and negative selection across traits, years and environments in a long-lived plant species (*Pinus pinaster* Ait.) *bioRxiv*.

- Falush, D., Stephens, M., and Pritchard, J. K. 2003. Inference of Population Structure Using Multilocus Genotype Data: Linked Loci and Correlated Allele Frequencies. *Genetics* **164**: 1567–1587.
- Felsenstein, J. 1976. The theoretical population genetics of variable selection and migration. *Annual review of genetics* **10**: 253– 280.
- Fijarczyk, A. and Babik, W. 2015. Detecting balancing selection in genomes: limits and prospects. *Molecular Ecology* **24**: 3529– 3545.
- Fisher, R. A. 1930. *The genetical theory of natural selection*. Oxford: Clarendon Press.
- Fu, W. and Akey, J. M. 2013. Selection and Adaptation in the Human Genome. *Annual Review of Genomics and Human Genetics* **14**: 467– 489.
- Gaspar, M. J., Velasco, T., Feito, I., Alía, R., and Majada, J. 2013. Genetic Variation of Drought Tolerance in *Pinus pinaster* at Three Hierarchical Levels: A Comparison of Induced Osmotic Stress and Field Testing. *PLOS ONE* **8**: e79094.
- Gauzere, J., Teuf, B., Davi, H., Chevin, L.-M., Caignard, T., Leys, B., Delzon, S., Ronce, O., and Chuine, I. 2020. Where is the optimum? Predicting the variation of selection along climatic gradients and the adaptive value of plasticity. A case study on tree phenology. *Evolution Letters* **4**: 109– 123.
- Gienapp, P., Fior, S., Guillaume, F., Lasky, J. R., Sork, V. L., and Csilléry, K. 2017. Genomic Quantitative Genetics to Study Evolution in the Wild. *Trends in Ecology & Evolution* **32**: 897– 908.
- González-Martínez, S. C., Alía, R., and Gil, L. 2002. Population genetic structure in a Mediterranean pine (*Pinus pinaster* Ait.): a comparison of allozyme markers and quantitative traits. *Heredity* **89**: 199– 206.
- González-Martínez, S. C., Burczyk, J., Nathan, R., Nanos, N., Gil, L., and Alía, R. 2006. Effective gene dispersal and female reproductive success in Mediterranean maritime pine (*Pinus pinaster* Aiton). *Molecular Ecology* **15**: 4577– 4588.
- González-Martínez, S. C., Gómez, A., Carrión, J. S., Agúndez, D., Alía, R., and Gil, L. 2007. Spatial genetic structure of an explicit glacial refugium of maritime pine (*Pinus pinaster* Aiton) insoutheastern Spain. Page 257– 269. in Weiss, S. and Ferrand, N., editors. *Phylogeography of Southern European Refugia: Evolutionary perspectives on the origins and conservation of European biodiversity*. Dordrecht: Springer Netherlands.
- Grattapaglia, D., Plomion, C., Kirst, M., and Sederoff, R. R. 2009. Genomics of growth traits in forest trees. *Current Opinion in Plant Biology* **12**: 148– 156.
- Grivet, D., Sebastiani, F., Alía, R., Bataillon, T., Torre, S., Zabal-Aguirre, M., Vendramin, G. G., and González-Martínez, S. C. 2011. Molecular Footprints of Local Adaptation in Two Mediterranean Conifers. *Molecular Biology and Evolution* **28**: 101– 116.
- Hamrick, J. L. 2004. Response of forest trees to global environmental changes. *Forest Ecology and Management* **197**: 323– 335.
- Hedrick, P. W. 1986. Genetic Polymorphism in Heterogeneous Environments: A Decade Later. *Annual Review of Ecology and Systematics* **17**: 535– 566.
- 2006. Genetic Polymorphism in Heterogeneous Environments: The Age of Genomics. *Annual Review of Ecology, Evolution, and Systematics* **37**: 67– 93.
- Hereford, J., Hansen, T. F., and Houle, D. 2004. Comparing Strengths of Directional Selection: How Strong Is Strong? *Evolution* **58**: 2133– 2143.
- Hiederer, R., European Commission, Joint Research Centre, and Institute for Environment and Sustainability 2013. *Mapping soil properties for Europe spatial representation of soil database attributes*. Luxembourg: Publications Office.

- Hoffmann, A. A. and Merilä, J. 1999. Heritable variation and evolution under favourable and unfavourable conditions. *Trends in Ecology & Evolution* **14**: 96– 101.
- Hoffmann, A. A. and Parsons, P. A. 1991. *Evolutionary genetics and environmental stress*. Oxford University Press.
- Houle, D. 1992. Comparing evolvability and variability of quantitative traits. *Genetics* **130**: 195– 204.
- Howe, G. T., Aitken, S. N., Neale, D. B., Jermstad, K. D., Wheeler, N. C., and Chen, T. H. 2003. From genotype to phenotype: unraveling the complexities of cold adaptation in forest trees. *Canadian Journal of Botany* **81**: 1247– 1266.
- Huang, Y., Stinchcombe, J. R., and Agrawal, A. F. 2015. Quantitative genetic variance in experimental fly populations evolving with or without environmental heterogeneity. *Evolution* **69**: 2735– 2746.
- Hurel, A., Miguel, M. de, Dutech, C., Desprez-Loustau, M.-L., Plomion, C., Rodríguez-Quilón, I., Cyrille, A., Guzman, T., Alía, R., González-Martínez, S. C., and Budde, K. B. 2019. Genetic basis of susceptibility to *Diplodia sapinea* and *Armillaria ostoyae* in maritime pine. *bioRxiv*: 699389.
- Husby, A., Visser, M. E., and Kruuk, L. E. B. 2011. Speeding Up Microevolution: The Effects of Increasing Temperature on Selection and Genetic Variance in a Wild Bird Population. *PLOS Biology* **9**: e1000585.
- Jansson, G., Li, B., and Hannrup, B. 2003. Time Trends in Genetic Parameters for Height and Optimal Age for Parental Selection in Scots Pine. *Forest Science* **49**: 696– 705.
- Jaramillo-Correa, J.-P., Rodríguez-Quilón, I., Grivet, D., Lepoittevin, C., Sebastiani, F., Heuertz, M., Garnier-Géré, P. H., Alía, R., Plomion, C., Vendramin, G. G., and González-Martínez, S. C. 2015. Molecular Proxies for Climate Maladaptation in a Long-Lived Tree (*Pinus pinaster* Aiton, Pinaceae). *Genetics* **199**: 793– 807.
- Johnson, G. R., Sniezko, R. A., and Mandel, N. L. 1997. Age trends in Douglas-fir genetic parameters and implications for optimum selection age. *Silvae Genetica*. **46**: 349-358.
- Johnson, T. and Barton, N. H. 2005. Theoretical models of selection and mutation on quantitative traits. *Philosophical Transactions of the Royal Society B: Biological Sciences* **360**: 1411– 1425.
- Jump, A. S. and Peñuelas, J. 2005. Running to stand still: adaptation and the response of plants to rapid climate change. *Ecology Letters* **8**: 1010– 1020.
- Karasov, T. L., Kniskern, J. M., Gao, L., DeYoung, B. J., Ding, J., Dubiella, U., Lastra, R. O., Nallu, S., Roux, F., Innes, R. W., Barrett, L. G., Hudson, R. R., and Bergelson, J. 2014. The long-term maintenance of a resistance polymorphism through diffuse interactions. *Nature* **512**: 436– 440.
- Körner, C. 1995. Alpine Plant Diversity: A Global Survey and Functional Interpretations. Page 45– 62. in Chapin, F. S. and Körner, C., editors. *Arctic and Alpine Biodiversity: Patterns, Causes and Ecosystem Consequences*. Berlin, Heidelberg: Springer.
- Kremer, A., Ronce, O., Robledo-Arnuncio, J. J., Guillaume, F., Bohrer, G., Nathan, R., Bridle, J. R., Gomulkiewicz, R., Klein, E. K., Ritland, K., Kuparinen, A., Gerber, S., and Schueler, S. 2012. Long-distance gene flow and adaptation of forest trees to rapid climate change. *Ecology Letters* **15**: 378– 392.
- Kroon, J., Ericsson, T., Jansson, G., and Andersson, B. 2011. Patterns of genetic parameters for height in field genetic tests of *Picea abies* and *Pinus sylvestris* in Sweden. *Tree Genetics & Genomes* **7**: 1099– 1111.

- Kruuk, L. E. B., Clutton-Brock, T. H., Slate, J., Pemberton, J. M., Brotherstone, S., and Guinness, F. E. 2000. Heritability of fitness in a wild mammal population. *Proceedings of the National Academy of Sciences* **97**: 698– 703.
- Kurt, Y., González-Martínez, S. C., Alía, R., and Isik, K. 2012. Genetic differentiation in *Pinus brutia* Ten. using molecular markers and quantitative traits: the role of altitude. *Annals of Forest Science* **69**: 345– 351.
- Kusnandar, D., Galwey, N. W., Hertzler, G. L., and Butcher, T. B. 1998. Age Trends in Variances and Heritabilities for Diameter and Height in Maritime Pine (*Pinus pinaster* AIT.) in Western Australia. *Silvae Genetica* **47**: 136– 141.
- Lamy, J.-B., Delzon, S., Bouche, P. S., Alia, R., Vendramin, G. G., Cochard, H., and Plomion, C. 2014. Limited genetic variability and phenotypic plasticity detected for cavitation resistance in a Mediterranean pine. *New Phytologist* **201**: 874– 886.
- Leites, L. P., Robinson, A. P., Rehfeldt, G. E., Marshall, J. D., and Crookston, N. L. 2012. Height-growth response to climatic changes differs among populations of Douglas-fir: a novel analysis of historic data. *Ecological Applications* **22**: 154– 165.
- Lepoittevin, C., Rousseau, J.-P., Guillemin, A., Gauvrit, C., Besson, F., Hubert, F., da Silva Perez, D., Harvengt, L., and Plomion, C. 2011. Genetic parameters of growth, straightness and wood chemistry traits in *Pinus pinaster*. *Annals of Forest Science* **68**: 873– 884.
- Levene, H. 1953. Genetic Equilibrium When More Than One Ecological Niche is Available. *The American Naturalist* **87**: 331– 333.
- Lin, Y., Yang, H., Ivković, M., Gapare, W. J., Colin Matheson, A., and Wu, H. X. 2013. Effect of genotype by spacing interaction on radiata pine genetic parameters for height and diameter growth. *Forest Ecology and Management* **304**: 204– 211.
- Linhart, Y. B. and Grant, M. C. 1996. Evolutionary Significance of Local Genetic Differentiation in Plants. *Annual Review of Ecology and Systematics* **27**: 237– 277.
- Lu, P. and Charrette, P. 2008. Genetic parameter estimates for growth traits of black spruce in northwestern Ontario. *Canadian Journal of Forest Research*.
- de-Lucas, A. I., Robledo-Arnuncio, J. J., Hidalgo, E., and González-Martínez, S. C. 2008. Mating system and pollen gene flow in Mediterranean maritime pine. *Heredity* **100**: 390– 399.
- Lynch, M. and Walsh, B. 1998. “Genetics and Analysis of Quantitative Traits”.
- Mackay, T. F. C. 1981. Genetic variation in varying environments. *Genetics Research* **37**: 79– 93.
- Marchi, M., Castellanos-Acuña, D., Hamann, A., Wang, T., Ray, D., and Menzel, A. 2020. ClimateEU, scale-free climate normals, historical time series, and future projections for Europe. *Scientific Data* **7**: 428.
- Marks, H. L. 1978. Long term selection for four-week body weight in Japanese quail under different nutritional environments. *Theoretical and Applied Genetics* **52**: 105– 111.
- McDonald, T. K. and Yeaman, S. 2018. Effect of migration and environmental heterogeneity on the maintenance of quantitative genetic variation: a simulation study. *Journal of Evolutionary Biology* **31**: 1386– 1399.
- McDowell, N. G. and Allen, C. D. 2015. Darcy’s law predicts widespread forest mortality under climate warming. *Nature Climate Change* **5**: 669– 672.
- Merilä, J., Sheldon, B., and Kruuk, L. 2001. Explaining stasis: microevolutionary studies in natural populations. *Genetica* **112**: 199– 222.
- Merilä, J., Söderman, F., O’Hara, R., Räsänen, K., and Laurila, A. 2004. Local Adaptation and Genetics of Acid-Stress Tolerance in the Moor Frog, *Rana arvalis*. *Conservation Genetics* **5**: 513– 527.

- Mitchell-Olds, T., Willis, J. H., and Goldstein, D. B. 2007. Which evolutionary processes influence natural genetic variation for phenotypic traits? *Nature Reviews Genetics* **8**: 845– 856.
- Neale, D. B. and Savolainen, O. 2004. Association genetics of complex traits in conifers. *Trends in Plant Science* **9**: 325– 330.
- Paaby, A. B. and Rockman, M. V. 2014. Cryptic genetic variation: evolution’s hidden substrate. *Nature Reviews Genetics* **15**: 247– 258.
- Petit, R. J. and Hampe, A. 2006. Some Evolutionary Consequences of Being a Tree. *Annual Review of Ecology, Evolution, and Systematics* **37**: 187– 214.
- Petit, R. J., Bialozyt, R., Garnier-Géré, P., and Hampe, A. 2004. Ecology and genetics of tree invasions: from recent introductions to Quaternary migrations. *Forest Ecology and Management* **197**: 117– 137.
- Plomion, C., Bartholomé, J., Lesur, I., Boury, C., Rodríguez-Quilón, I., Lagrault, H., Ehrenmann, F., Bouffier, L., Gion, J. M., Grivet, D., Miguel, M. de, María, N. de, Cervera, M. T., Bagnoli, F., Isik, F., Vendramin, G. G., and González-Martínez, S. C. 2016. High-density SNP assay development for genetic analysis in maritime pine (*Pinus pinaster*). *Molecular Ecology Resources* **16**: 574– 587.
- Price, T. and Schluter, D. 1991. On the Low Heritability of Life-History Traits. *Evolution* **45**: 853– 861.
- Pritchard, J. K., Stephens, M., and Donnelly, P. 2000. Inference of Population Structure Using Multilocus Genotype Data. *Genetics* **155**: 945– 959.
- R Core Team 2020. *R: A Language and Environment for Statistical Computing*. R Foundation for Statistical Computing. Vienna, Austria.
- Ramírez-Valiente, J. A., Etterson, J. R., Deacon, N. J., and Cavender-Bares, J. 2019. Evolutionary potential varies across populations and traits in the neotropical oak *Quercus oleoides*. *Tree Physiology* **39**: 427– 439.
- Rehfeldt, G. E., Ying, C. C., Spittlehouse, D. L., and Hamilton, D. A. 1999. Genetic Responses to Climate in *Pinus contorta*: Niche Breadth, Climate Change, and Reforestation. *Ecological Monographs* **69**: 375– 407.
- Richardson, J. L., Urban, M. C., Bolnick, D. I., and Skelly, D. K. 2014. Microgeographic adaptation and the spatial scale of evolution. *Trends in Ecology & Evolution* **29**: 165– 176.
- Riley, S. J., DeGloria, S. D., and Elliot, R. 1999. Index that quantifies topographic heterogeneity. *Intermountain Journal of Sciences* **5**: 23– 27.
- Robledo-Arnuncio, J. J. and Gil, L. 2005. Patterns of pollen dispersal in a small population of *Pinus sylvestris* L. revealed by total-exclusion paternity analysis. *Heredity* **94**: 13– 22.
- Rodríguez-Quilón, I., Santos-del-Blanco, L., Serra-Varela, M. J., Koskela, J., González-Martínez, S. C., and Alía, R. 2016. Capturing neutral and adaptive genetic diversity for conservation in a highly structured tree species. *Ecological Applications* **26**: 2254– 2266.
- Santos-del-Blanco, L., Climent, J., González-Martínez, S. C., and Pannell, J. R. 2012. Genetic differentiation for size at first reproduction through male versus female functions in the widespread Mediterranean tree *Pinus pinaster*. *Annals of Botany* **110**: 1449– 1460.
- Savolainen, O., Pyhäjärvi, T., and Knürr, T. 2007. Gene Flow and Local Adaptation in Trees. *Annual Review of Ecology, Evolution, and Systematics* **38**: 595– 619.
- Schlichting, C. D. 2008. Hidden Reaction Norms, Cryptic Genetic Variation, and Evolvability. *Annals of the New York Academy of Sciences* **1133**: 187– 203.
- Schuster, W. S. F. and Mitton, J. B. 2000. Paternity and gene dispersal in limber pine (*Pinus flexilis* James). *Heredity* **84**: 348– 361.

- Scotti-Saintagne, C., Bodénès, C., Barreneche, T., Bertocchi, E., Plomion, C., and Kremer, A. 2004. Detection of quantitative trait loci controlling bud burst and height growth in *Quercus robur* L. *Theoretical and Applied Genetics* **109**: 1648– 1659.
- Scotti, I., González-Martínez, S. C., Budde, K. B., and Lalagüe, H. 2016. Fifty years of genetic studies: what to make of the large amounts of variation found within populations? *Annals of Forest Science* **73**: 69– 75.
- Sierra-Lucero, V., McKeand, S., Huber, D., Rockwood, D., and White, T. 2002. Performance Differences and Genetic Parameters for Four Coastal Provenances of Loblolly Pine in the South-eastern United States. *Forest Science* **48**: 732– 742.
- Spichtig, M. and Kawecki, T. J. 2004. The Maintenance (or Not) of Polygenic Variation by Soft Selection in Heterogeneous Environments. *The American Naturalist* **164**: 70– 84.
- Stein, A., Gerstner, K., and Kreft, H. 2014. Environmental heterogeneity as a universal driver of species richness across taxa, biomes and spatial scales. *Ecology Letters* **17**: 866– 880.
- Stock, A. J., Campitelli, B. E., and Stinchcombe, J. R. 2014. Quantitative genetic variance and multivariate clines in the Ivyleaf morning glory, *Ipomoea hederacea*. *Philosophical Transactions of the Royal Society B: Biological Sciences* **369**: 20130259.
- Stovall, A. E. L., Shugart, H., and Yang, X. 2019. Tree height explains mortality risk during an intense drought. *Nature Communications* **10**: 1– 6.
- Thibault, E., Soolanayakanahally, R., and Keller, S. R. 2020. Latitudinal clines in bud flush phenology reflect genetic variation in chilling requirements in balsam poplar, *Populus balsamifera*. *American Journal of Botany* **107**: 1597– 1605.
- Tigano, A. and Friesen, V. L. 2016. Genomics of local adaptation with gene flow. *Molecular Ecology* **25**: 2144– 2164.
- Triantis, K. A., Mylonas, M., Lika, K., and Vardinoyannis, K. 2003. A model for the species–area–habitat relationship. *Journal of Biogeography* **30**: 19– 27.
- van Heerwaarden, B., Kellermann, V., Schiffer, M., Blacket, M., Sgrò, C. M., and Hoffmann, A. A. 2009. Testing evolutionary hypotheses about species borders: patterns of genetic variation towards the southern borders of two rainforest *Drosophila* and a related habitat generalist. *Proceedings of the Royal Society B: Biological Sciences* **276**: 1517– 1526.
- Viñas, R. A., Caudullo, G., Oliveira, S., and de Rigo, D. 2016. *Pinus pinaster* in Europe: distribution, habitat, usage and threats.
- Vitasse, Y. V., Delzon, S. D., Bresson, C. C. B. C., Michalet, R. M., and Kremer, A. K. 2009. Altitudinal differentiation in growth and phenology among populations of temperate-zone tree species growing in a common garden. *Canadian Journal of Forest Research*.
- Walsh, B. and Blows, M. W. 2009. Abundant Genetic Variation + Strong Selection = Multivariate Genetic Constraints: A Geometric View of Adaptation. *Annual Review of Ecology, Evolution, and Systematics* **40**: 41– 59.
- Walsh, B. and Lynch, M. 2018. *Evolution and Selection of Quantitative Traits*. Oxford University Press.
- Wilson, A. J., Pemberton, J. M., Pilkington, J. G., Coltman, D. W., Mifsud, D. V., Clutton-Brock, T. H., and Kruuk, L. E. B. 2006. Environmental Coupling of Selection and Heritability Limits Evolution. *PLOS Biology* **4**: e216.
- Wood, C. W. and Brodie, E. D. 2015. Environmental effects on the structure of the G-matrix. *Evolution* **69**: 2927– 2940.
- 2016. Evolutionary response when selection and genetic variation covary across environments. *Ecology Letters* **19**: 1189– 1200.

- Wu, H. X. and Ying, C. C. 2004. Geographic pattern of local optimality in natural populations of lodgepole pine. *Forest Ecology and Management* **194**: 177– 198.
- Wyckoff, P. H. and Clark, J. S. 2002. The relationship between growth and mortality for seven co-occurring tree species in the southern Appalachian Mountains. *Journal of Ecology* **90**: 604– 615.
- Yeaman, S., Chen, Y., and Whitlock, M. C. 2010. No Effect of Environmental Heterogeneity on the Maintenance of Genetic Variation in Wing Shape in *Drosophila Melanogaster*. *Evolution* **64**: 3398– 3408.
- Yeaman, S., Hodgins, K. A., Lotterhos, K. E., Suren, H., Nadeau, S., Degner, J. C., Nurkowski, K. A., Smets, P., Wang, T., Gray, L. K., Liepe, K. J., Hamann, A., Holliday, J. A., Whitlock, M. C., Rieseberg, L. H., and Aitken, S. N. 2016. Convergent local adaptation to climate in distantly related conifers. *Science* **353**: 1431– 1433.
- Yeaman, S. and Jarvis, A. 2006. Regional heterogeneity and gene flow maintain variance in a quantitative trait within populations of lodgepole pine. *Proceedings of the Royal Society B: Biological Sciences* **273**: 1587– 1593.
- Zhu, Y., Hogan, J. A., Cai, H., Xun, Y., Jiang, F., and Jin, G. 2017. Biotic and abiotic drivers of the tree growth and mortality trade-off in an old-growth temperate forest. *Forest Ecology and Management* **404**: 354– 360.
